# Supplementary material
Source: Springer Nature journal article supplement (https://www.springermedizin.de/resource/supplementary/12874_2004_101_MOESM2_ESM.pdf/9433768)
Supplement: MOESM2 [file 9433768]

|                                                                                                                                                                                              |                                                                                                                                                                          | The Sample size ranges from 8 to 15.                                                                                                                                          | The Sample size ranges from 16 to 35.                                                                                                                        | The Sample size ranges from 36 to 72.                                                                                            | The Sample size ranges from 73 to 100 and beyond.                             |
|----------------------------------------------------------------------------------------------------------------------------------------------------------------------------------------------|--------------------------------------------------------------------------------------------------------------------------------------------------------------------------|-------------------------------------------------------------------------------------------------------------------------------------------------------------------------------|--------------------------------------------------------------------------------------------------------------------------------------------------------------|----------------------------------------------------------------------------------------------------------------------------------|-------------------------------------------------------------------------------|
| <b>Approximation of the mean.</b> Each number in this table represents the average relative error of estimating the sample mean in 200 samples from a log-normal distribution.               | <b>LEGEND:</b><br>The median approximation is represented by black crosses, Formula (4) is represented by blue boxes, and Formula (5) by red diamonds.                   |                                                                                                                                                                               |                                                                                                                                                              |                                                                                                                                  |                                                                               |
|                                                                                                                                                                                              | <b>Median</b>                                                                                                                                                            | 5.71 %                                                                                                                                                                        | 4.94 %                                                                                                                                                       | 4.50 %                                                                                                                           | 4.42 %                                                                        |
|                                                                                                                                                                                              | <b>Formula (4)</b>                                                                                                                                                       | 4.05 %                                                                                                                                                                        | 5.92 %                                                                                                                                                       | 8.00 %                                                                                                                           | 9.99 %                                                                        |
|                                                                                                                                                                                              | <b>Formula (5)</b>                                                                                                                                                       | 3.61 %                                                                                                                                                                        | 5.58 %                                                                                                                                                       | 7.78 %                                                                                                                           | 9.83 %                                                                        |
|                                                                                                                                                                                              | <b>Conclusion</b>                                                                                                                                                        | Formula (5) is within 4% of the actual sample mean and is performing the best. Formula (4) is almost indistinguishable from Formula (5), and the median is very close behind. | All three of these formulas are very close (the scale is within 6%), but the median approximation starts being better when the sample size reaches about 22. | The median continues to be the best estimator, separating itself from the other two formulas for the sample sizes in this range. | The averages stabilize and remain fairly steady as the sample size increases. |
| <b>Approximation of the standard deviation.</b> Each number in this table represents the average relative error of estimating the sample mean in 200 samples from a log-normal distribution. | <b>LEGEND:</b><br>The Formula (12) is shown using black crosses, Formula (16) is represented by blue boxes; Range/4 by the green circles, and Range/6 by brown diamonds. |                                                                                                                                                                               |                                                                                                                                                              |                                                                                                                                  |                                                                               |
|                                                                                                                                                                                              | <b>Formula (12)</b>                                                                                                                                                      | 11.62 %                                                                                                                                                                       | 15.83 %                                                                                                                                                      | 24.24 %                                                                                                                          | 32.35 %                                                                       |
|                                                                                                                                                                                              | <b>Formula (16)</b>                                                                                                                                                      | 8.87 %                                                                                                                                                                        | 19.88 %                                                                                                                                                      | 37.25 %                                                                                                                          | 49.94 %                                                                       |
|                                                                                                                                                                                              | <b>Range/4</b>                                                                                                                                                           | 14.94 %                                                                                                                                                                       | 9.88 %                                                                                                                                                       | 17.90 %                                                                                                                          | 27.64 %                                                                       |
|                                                                                                                                                                                              | <b>Range/6</b>                                                                                                                                                           | 42.93 %                                                                                                                                                                       | 32.23 %                                                                                                                                                      | 22.28 %                                                                                                                          | 16.37 %                                                                       |
| <b>Conclusion</b>                                                                                                                                                                            | Formula (16) is the best estimator of the standard deviation in this range of sample sizes.                                                                              | The Range/4 formula takes over as the best estimate for the variance                                                                                                          | The Range/4 formula is slowly losing its advantage, and the Range/6 formula is closing in.                                                                   | The Range/6 takes over the lead in accuracy, and keeps it as the sample sizes increase.                                          |                                                                               |

TABLE 2: Log-Normal Distribution with parameters  $\mu = 4$  and  $\sigma = 0.3$ .
